# Supplementary material
Source: publisher site journal article supplement (https://www.dovepress.com/article/331303)
Supplement: Supplementary file 1 [file get_supplementary_file.php]

## Supplementary materials

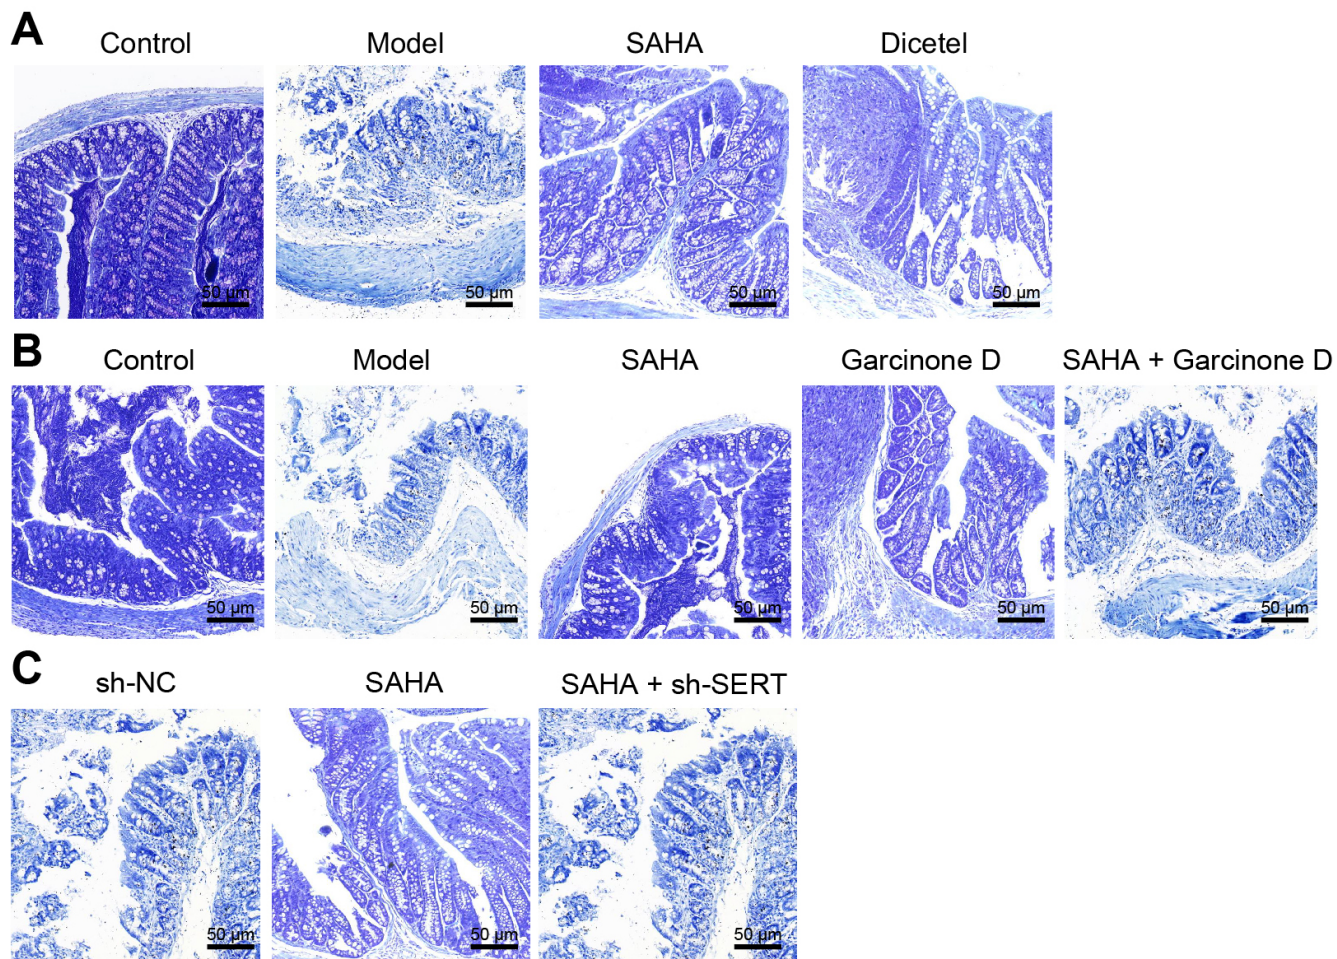

**Figure S1** Representative toluidine blue staining images of mast cells in the colon tissues of rats in each group

A: Representative toluidine blue staining images of mast cells in the colon tissues of rats in the control, model, and SAHA treatment groups; B: Representative toluidine blue staining images of mast cells in the colon tissues of rats in the model, SAHA, Garcinone D and SAHA + Garcinone D groups; C: Representative toluidine blue staining images of mast cells in the colon tissues of rats in the sh-NC, SAHA and SAHA + sh-SERT groups.

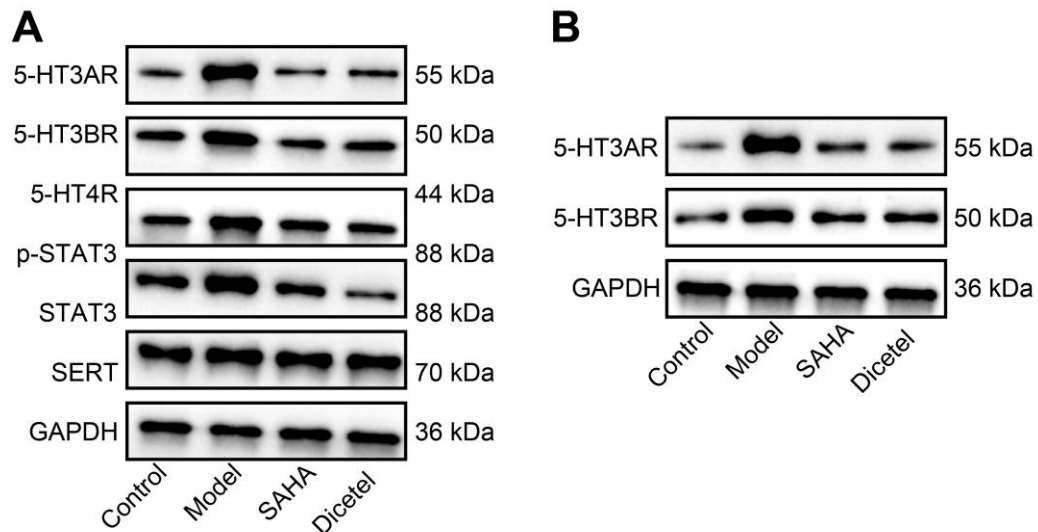

**Figure S2** Representative Western blots of 5-HT3AR, 5-HT3BR, 5-HT4R, SERT, STAT3, and p-STAT3 in the colon tissues of rats in each group.

A: Representative Western blots of 5-HT3AR, 5-HT3BR, 5-HT4R, SERT, STAT3, and p-STAT3 in the colon tissues of rats in each group; B: Representative Western blots of 5-HT3AR and 5-HT3BR in the spinal cord tissues of rats in each group.

**Table S1** Primer sequences

|                           | Primer sequence (5' to 3') | Primer length |
|---------------------------|----------------------------|---------------|
| 5-HT3AR upstream primers  | AGAAGTGAGGTCCGGACAAGAGCAT  |               |
| 5-HT3AR downstream primer | TGAGGAAGATACTGGGCAGCAAG    | 197           |
| 5-HT3BR upstream primer   | AGGTCTTTTCTGAATGACAGCGAG   |               |
| 5-HT3BR downstream primer | CAATGGACATCTGCGAATCACTAC   | 126           |
| 5-HT4R upstream primer    | TTTCAGACGTGCCTTCCTTATCA    | 143           |
| 5-HT4R downstream primer  | CACCACATTCCACTGTATCCCTTA   |               |
| SERT upstream primer      | ATAGCCAACATGCCAGCATCCAC    | 170           |
| SERT downstream primer    | ACCACGATGAGCACGAACCATTC    |               |
| STAT3 upstream primers    | TTTGAGACAGAGGTGTACCACCAAG  | 118           |
| STAT3 downstream primer   | ACCACAGGATTGATGCCCAAG      |               |
| GAPDH upstream primer     | CCTTCCGTGTTCTACCCC         | 131           |
| GAPDH downstream primer   | GCCCAGGATGCCCTTTAGTG       |               |
